# Supplementary material for: Multi-layered stacks of fluorescent dye-doped silica nanoparticles decorated by gold nanoparticles for solid-phase optical biosensing
Source: Royal Society of Chemistry journal article supplement (doi:10.1039/c1jm13956h), 2011-01-01
Supplement: c1jm13956h.pdf [file c1jm13956h.pdf]

Supplementary Information

## Multi-layered stacks of fluorescent dye-doped silica nanoparticles decorated by gold nanoparticles for solid-phase optical biosensing

Seong Yoon Lim<sup>a</sup>, Jae Hong Kim<sup>a</sup>, Joon Seok Lee<sup>a</sup>, Junhyoung Ahn<sup>b</sup>, Min-Gon Kim<sup>b</sup>,  
and Chan Beum Park<sup>a,\*</sup>

<sup>a</sup> Department of Materials Science and Engineering, Korea Advanced Institute of Science and Technology 335 Science Road, Daejeon 305-701, Republic of Korea

<sup>b</sup> Advanced Photonics Research Institute and Graduate Program of Photonics and Applied Physics, Gwangju Institute of Science and Technology, Gwangju 500-712, Republic of Korea

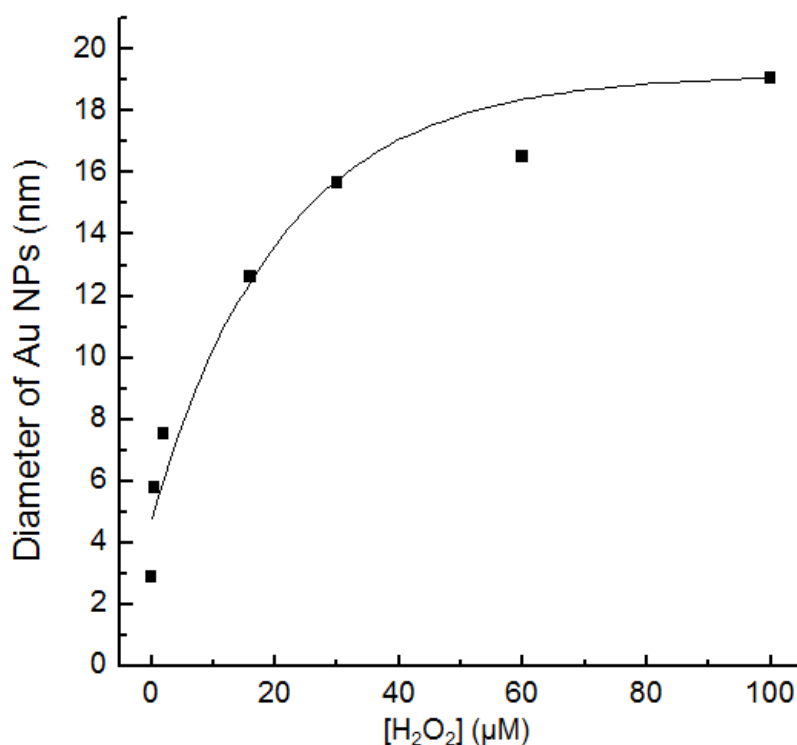

Fig. S1. The diameter of Au NPs on FSN-Au NP probes after the growth reaction with different H<sub>2</sub>O<sub>2</sub> concentration. The diameter was determined by calculating the average diameter of 30 Au NPs grown on single FSN according to TEM images. For the Au NP growth reaction, FSN-Au NPs and HAuCl<sub>4</sub> (0.2 mM) in 10 mM phosphate buffer (pH 7.0) were reacted with H<sub>2</sub>O<sub>2</sub> from 0 to 100 μM at 37 °C for 20 min.
